# Supplementary material
Source: publisher figshare collection journal article supplement (https://acs.figshare.com/ndownloader/files/9360484)
Supplement: Supplementary file 1 [file 9360484]

***Supporting information for***

**Unprecedented (4, 6)–connected net with mixed–valence  
 $M_2^{II}M^{III}$  trinuclear and  $M_6^{II}$  hexanuclear clusters (M = Ni,  
Co): syntheses, crystal structures and magnetic properties**

Lu Zhai,<sup>a, b</sup> Zhu–Xi Yang,<sup>a</sup> Wen–Wei Zhang,<sup>\*b</sup> Jing–Lin Zuo,<sup>b</sup> Xiao–Ming Ren<sup>\*a,b,c</sup>

<sup>a</sup> *State Key Laboratory of Materials–Oriented Chemical Engineering and College of Chemistry & Molecular Engineering, Nanjing Tech University, Nanjing 210009, P. R. China*

<sup>b</sup> *State Key Laboratory of Coordination Chemistry, School of Chemistry and Chemical Engineering, Nanjing University, Nanjing 210023 P. R. China*

<sup>c</sup> *College of Materials Science & Engineering, Nanjing Tech University, Nanjing 210009, P. R. China*

E–mail: [wwzhang@nju.edu.cn](mailto:wwzhang@nju.edu.cn) (WWZ); [xmren@njtech.edu.cn](mailto:xmren@njtech.edu.cn) (XMR)

**Table S1:** Selected bond lengths (Å) and angles (°) in **1** and **2**For compound **1**

|                                                                                     | Bond lengths (Å) |            | Bond angles (°) |           |               |           |
|-------------------------------------------------------------------------------------|------------------|------------|-----------------|-----------|---------------|-----------|
| 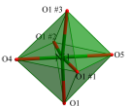   | Ni1–O1           | 2.041(5)   | O4–Ni1–O1       | 94.09(16) | O4–Ni1–O1#1   | 94.09(16) |
|                                                                                     | Ni1–O1#1         | 2.041(5)   | O4–Ni1–O1#2     | 94.09(16) | O1–Ni1–O1#3   | 171.8(3)  |
|                                                                                     | Ni1–O1#1         | 2.041(5)   | O1#1–Ni1–O1#2   | 171.8(3)  | O1#1–Ni1–O1   | 90.3(4)   |
|                                                                                     | Ni1–O1#1         | 2.041(5)   | O1–Ni1–O1#2     | 90.3(4)   | O1–Ni1–O1#2   | 89.1(4)   |
|                                                                                     | Ni1–O4           | 1.9851(19) | O1–Ni1–O1#3     | 89.1(4)   | O4–Ni1–O5     | 180.0     |
|                                                                                     | Ni1–O5           | 2.137(11)  | O1#1–Ni1–O5     | 85.91(16) | O1–Ni1–O5     | 85.91(16) |
|                                                                                     | Bond lengths     |            | Bond angles     |           |               |           |
|    | Ni2–O3           | 2.050(7)   | O1#3–Ni2–O5     | 85.91(16) | O3–Ni2–O3#6   | 90.8(5)   |
|                                                                                     | Ni2–O3#4         | 2.050(7)   | O3#4–Ni2–O3#5   | 90.8(5)   | O3–Ni2–O3#5   | 175.7(6)  |
|                                                                                     | Ni2–O3#5         | 2.050(7)   | O3#4–Ni2–O3#6   | 175.7(6)  | O3#5–Ni2–O3#6 | 89.0(5)   |
|                                                                                     | Ni2–O3#6         | 2.050(7)   | O3–Ni2–O3#4     | 89.0(5)   | O3–Ni2–O7     | 92.2(3)   |
|                                                                                     | Ni2–O6           | 2.08(2)    | O3#4–Ni2–O7     | 92.2(3)   | O3–Ni2–O6     | 87.8(3)   |
|                                                                                     | Ni2–O7           | 2.06(4)    | O7–Ni2–O6       | 180.0(4)  |               |           |
|                                                                                     | Bond lengths     |            | Bond angles     |           |               |           |
|  | Ni3–O2           | 1.986(13)  | O7–Ni3–O9       | 78.0(10)  | O8–Ni3–O9     | 97.3(6)   |
|                                                                                     | Ni3–O2#4         | 1.986(13)  | O7–Ni3–O2       | 91.4(8)   | O2–Ni3–O2#4   | 99.8(11)  |
|                                                                                     | Ni3–O7           | 1.73(2)    | O9–Ni3–O2       | 129.4(6)  | O7–Ni3–O8     | 175.3(12) |
|                                                                                     | Ni3–O8           | 2.14(3)    |                 |           |               |           |
|                                                                                     | Ni3–O9           | 1.963(6)   |                 |           |               |           |

Symmetry transformations used to generate equivalent atoms for **1**: #1=x, y, 1–z; #2=1–y, 1–x, z;

#3=1–y, 1–x, 1–z; #4=y, x, z; #5=y, x, –z; #6=x, y, –z.

For compound **2**

|                                                                                     | Bond lengths |            | Bond angles   |           |               |           |
|-------------------------------------------------------------------------------------|--------------|------------|---------------|-----------|---------------|-----------|
| 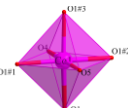 | Co1–O1       | 2.079(5)   | O6–Co1–O1     | 95.4(9)   | O6–Co1–O1#1   | 95.4(9)   |
|                                                                                     | Co1–O1#1     | 2.079(5)   | O1–Co1–O1#1   | 102.8(12) | O5–Co1–O6     | 180.00(4) |
|                                                                                     | Co1–O1#2     | 2.079(5)   | O1–Co1–O5     | 84.6(9)   | O1#1–Co1–O5   | 84.6(9)   |
|                                                                                     | Co1–O1#3     | 2.079(5)   | O6–Co1–O2#2   | 91.4(9)   | O1–Co1–O2#2   | 166.8(10) |
|                                                                                     | Co1–O4       | 2.0076(15) | O1–Co1–O2#3   | 87.8(4)   | O1#1–Co1–O2#2 | 92.0(4)   |
|                                                                                     | Co1–O5       | 2.152(11)  | O1#1–Co1–O2#3 | 87.8(4)   | O5–Co1–O2#2   | 88.6(9)   |
|                                                                                     | Bond lengths |            | Bond angles   |           |               |           |
|  | Co2–O3       | 2.063(7)   | O4–Co2–O4#5   | 90.2(4)   | O4–Co2–O4#4   | 89.7(4)   |
|                                                                                     | Co2–O3#4     | 2.063(7)   | O4#4–Co2–O4#5 | 177.8(5)  | O4–Co2–O7     | 88.9(2)   |
|                                                                                     | Co2–O3#5     | 2.063(7)   | O4–Co2–O8     | 91.1(2)   | O7–Co2–O8     | 180.00    |
|                                                                                     | Co2–O3#6     | 2.063(7)   |               |           |               |           |

|                                                                                   |              |           |             |          |             |          |
|-----------------------------------------------------------------------------------|--------------|-----------|-------------|----------|-------------|----------|
|                                                                                   | Co2–O6       | 2.10(2)   |             |          |             |          |
|                                                                                   | Co2–O7       | 2.07(3)   |             |          |             |          |
| 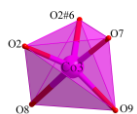 | Bond lengths |           | Bond angles |          |             |          |
|                                                                                   | Co3–O2       | 2.076(13) | O8–Co3–O9   | 173.8(6) | O8–Co3–O3   | 89.6(4)  |
|                                                                                   | Co3–O2#6     | 2.076(13) | O9–Co3–O3   | 94.3(3)  | O8–Co3–O3#5 | 89.6(4)  |
|                                                                                   | Co3–O7       | 1.828(19) | O9–Co3–O3#5 | 94.3(3)  | O3–Co–O3#5  | 102.0(7) |
|                                                                                   | Co3–O8       | 2.18(2)   |             |          |             |          |
|                                                                                   | Co3–O9       | 2.024(5)  |             |          |             |          |
|                                                                                   |              |           |             |          |             |          |

Symmetry transformations used to generate equivalent atoms for **2**: #1=x, y, 1–z; #2=1–y, 1–x, z;

#3=1–y, 1–x, 1–z; #4=x, y, –z; #5=y, x, –z, #6=y, x, z.

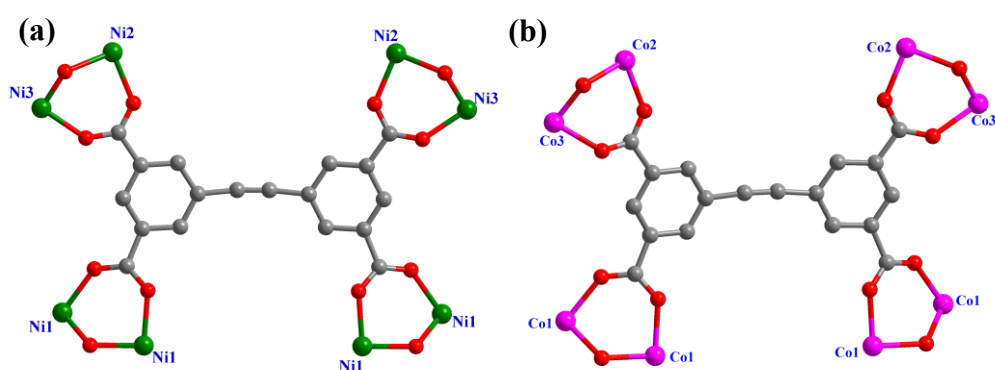

**Figure S1.** Coordination modes of the ligand in (a) **1** and (b) **2** and the two phenyl rings in EBTC<sup>4–</sup> ligand are almost coplanar (all hydrogen atoms were omitted for clarity) .

### Bond valence sum (BVS) analysis

Bond valence sum (BVS) analysis was used to identify the central anion as hydroxo or oxo as well as the oxidation states of metal ions. The valence of a bond between two atoms, *i* and *j* is given by  $S_{ij}$ . The BVS for a given metal ion is the sum of bond valences for each bond made to that metal ion. The  $r_0$  values are determined empirically such that the BVS is generally quite close to the oxidation state of the metal ion. In this work, *i* and *j* are Ni, O for compound **1** or Co, O for compound **2**. The charge  $V_i$  on one Ni1 or Co1 in the trinuclear M<sub>3</sub> unit is the sum of  $S_{ij}$  calculated from all six bonds connected to it, *ie*; the valence of the *i* atom. (See SI of *Chem. Commun.* **2007**, 840–842). B is a constant, the “universal parameter” ~0.37 Å. The

calculated results are shown in the following tables, which are closed to the literature result.

**For 1**

| Ni <sup>2+</sup> | $r_0$ | $r_{ij}$ | B     | $S_{ij}=\exp[(r_0.r_{ij})/B]$ |
|------------------|-------|----------|-------|-------------------------------|
| Ni1-O1           | 1.670 | 2.042    | 0.370 | 0.366                         |
| Ni1-O1           | 1.670 | 2.042    | 0.370 | 0.366                         |
| Ni1-O1           | 1.670 | 2.042    | 0.370 | 0.366                         |
| Ni1-O1           | 1.670 | 2.042    | 0.370 | 0.366                         |
| Ni1-O4           | 1.670 | 1.986    | 0.370 | 0.426                         |
| Ni1-O5           | 1.670 | 2.138    | 0.370 | 0.282                         |

$$V_{Ni}=\Sigma S_{ij}=+ 2.172; \quad V_{O4}=3 \times S_{Ni1-O4}= 1.278$$

| Ni <sup>3+</sup> | $r_0$ | $r_{ij}$ | B     | $S_{ij}=\exp[(r_0.r_{ij})/B]$ |
|------------------|-------|----------|-------|-------------------------------|
| Ni1-O1           | 1.750 | 2.042    | 0.370 | 0.454                         |
| Ni1-O1           | 1.750 | 2.042    | 0.370 | 0.454                         |
| Ni1-O1           | 1.750 | 2.042    | 0.370 | 0.454                         |
| Ni1-O1           | 1.750 | 2.042    | 0.370 | 0.454                         |
| Ni1-O4           | 1.750 | 1.986    | 0.370 | 0.528                         |
| Ni1-O5           | 1.750 | 2.138    | 0.370 | 0.350                         |

$$V_{Ni}=\Sigma S_{ij}=+ 2.694; \quad V_{O4}=3 \times S_{Ni1-O4}= 1.584$$

**For 2**

Values of  $r_0$  for Co-O bonds for oxidation states +2 and +3 used in the analysis<sup>1</sup>

| Co <sup>2+</sup> | $r_0$ | $r_{ij}$ | B     | $S_{ij}=\exp[(r_0.r_{ij})/B]$ |
|------------------|-------|----------|-------|-------------------------------|
| Co1-O1           | 1.692 | 2.079    | 0.370 | 0.35136                       |
| Co1-O1           | 1.692 | 2.079    | 0.370 | 0.35136                       |
| Co1-O1           | 1.692 | 2.079    | 0.370 | 0.35136                       |
| Co1-O1           | 1.692 | 2.079    | 0.370 | 0.35136                       |
| Co1-O4           | 1.692 | 2.008    | 0.370 | 0.42615                       |
| Co1-O5           | 1.692 | 2.152    | 0.370 | 0.28845                       |

$$V_{Co}=\Sigma S_{ij}=+ 2.120; \quad V_{O4}=3 \times S_{Co1-O4}= 1.278$$

| Co <sup>3+</sup> | $r_0$ | $r_{ij}$ | B     | $S_{ij}=\exp[(r_0.r_{ij})/B]$ |
|------------------|-------|----------|-------|-------------------------------|
| Co1-O1           | 1.754 | 2.079    | 0.370 | 0.41546                       |
| Co1-O1           | 1.754 | 2.079    | 0.370 | 0.41546                       |

|        |       |       |       |         |
|--------|-------|-------|-------|---------|
| Co1–O1 | 1.754 | 2.079 | 0.370 | 0.41546 |
| Co1–O1 | 1.754 | 2.079 | 0.370 | 0.41546 |
| Co1–O4 | 1.754 | 2.008 | 0.370 | 0.50334 |
| Co1–O5 | 1.754 | 2.152 | 0.370 | 0.34107 |

$$V_{\text{Co}} = \sum S_{ij} = + 2.506; \quad V_{\text{O4}} = 3 \times S_{\text{Co1-O4}} = 1.510$$

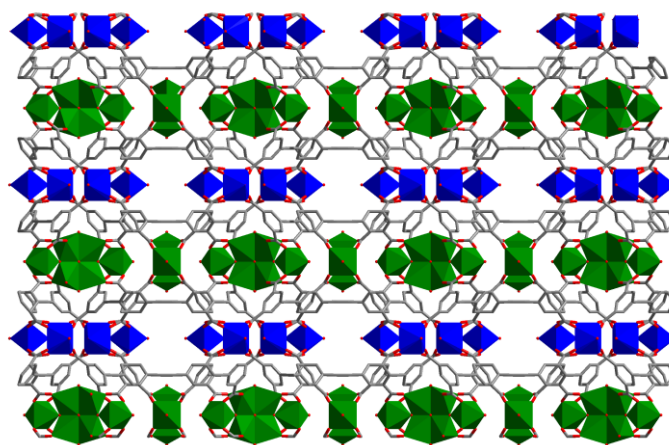

**Figure S2.** Polyhedral representation of the 3D framework of **1** showing layer structure along *b* axis (blue represents the trinuclear cluster and green represents the hexanuclear cluster in **1**, all hydrogen atoms are omitted for clarity).

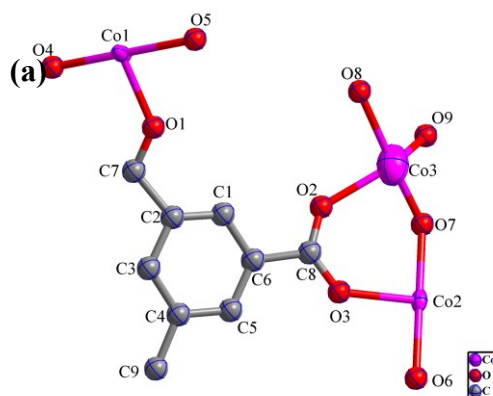

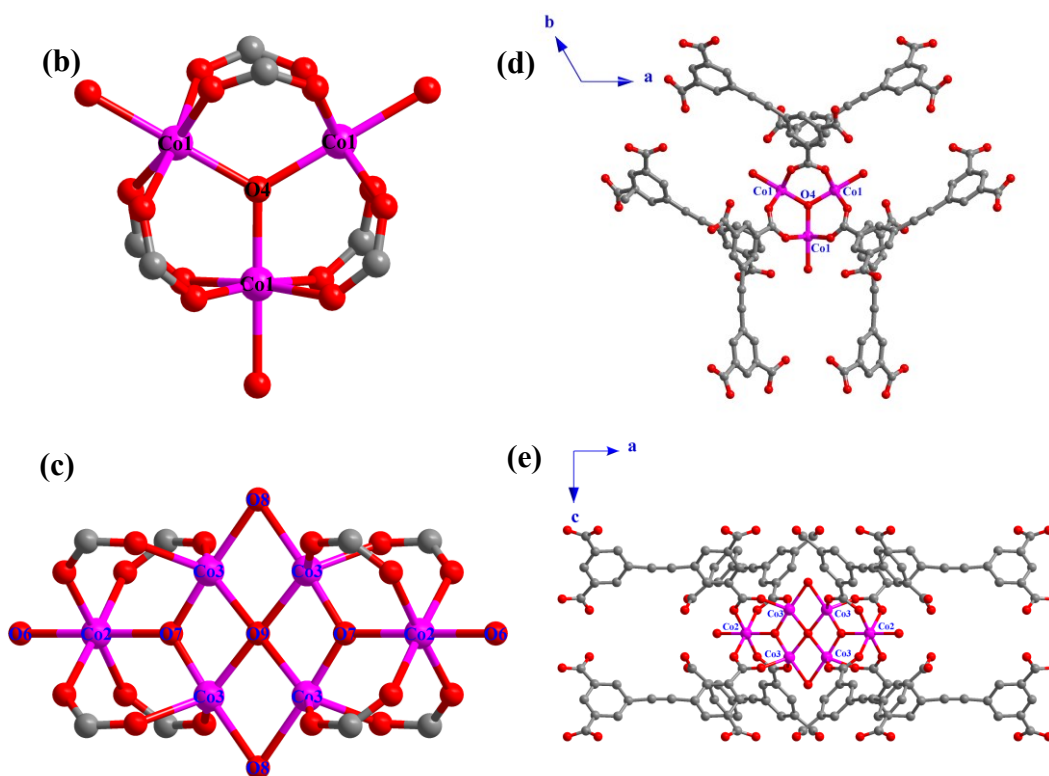

**Figure S3.** (a) An asymmetric unit of **2** with thermal ellipsoids at 50% probability level. (b) Perspective view of the trinuclear  $[\text{Co}_3\text{O}(\text{O}_2\text{C})_6]$  cluster and (c) the hexanuclear  $[\text{Co}_6(\mu_3\text{-O})_2(\mu_2\text{-O})_2(\text{O}_2\text{C})_8]$  cluster in **2**. (d) View of the trinuclear cluster and (e) the hexanuclear cluster as node being connected to six and eight EBTC<sup>4-</sup> ligands in **2**, respectively (all H atoms were omitted for clarity).

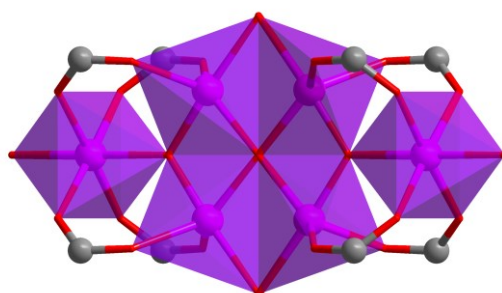

**Figure S4.** Polyhedral representation of the hexanuclear  $\{\text{Co}_6\text{O}_{23}\}$  unit in **2**.

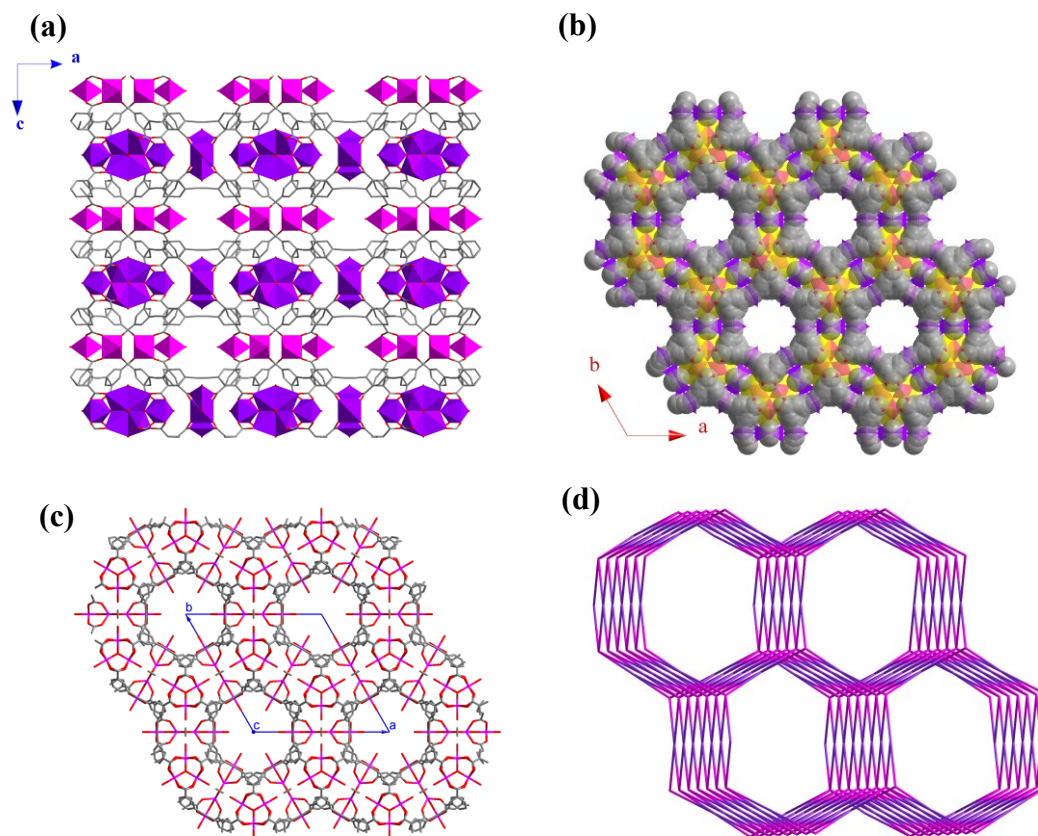

**Figure S5.** (a) Polyhedral representation of the 3D framework of **2** showing layer structure along the *b* axis. (b) The channels along the *c* axis surround by cages. (c) Representation of 3-D framework viewed along the *c* axis. (d) (4, 6)-connected network, where the pink represents the 6-connected node of trinuclear cluster and lavender represents the 4-connected node of the hexanuclear cluster in **2** (all H atoms were omitted for clarity).

### The PXRD Patterns

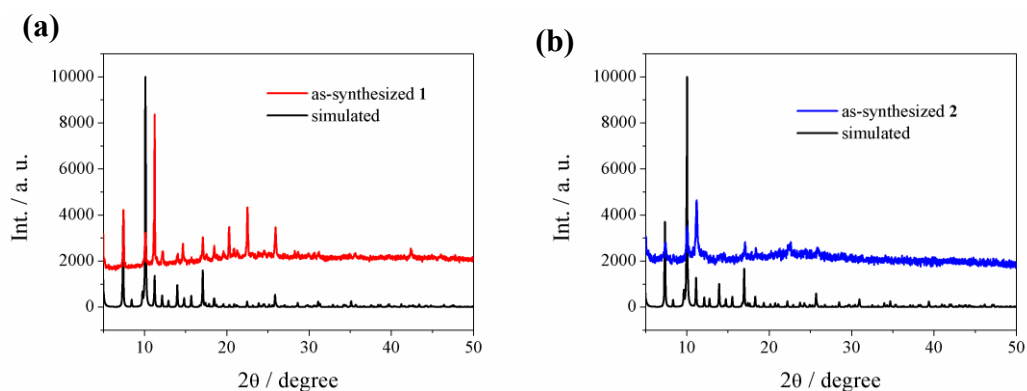

**Figure S6.** PXRD patterns of simulated from the X-ray single-crystal structures and

as-synthesized samples of **1** (a) and **2** (b) at ambient temperature.

The powder X-ray diffraction (PXRD) experiments for **1** and **2** were carried out carefully to check phase purity at room temperature. The patterns showed that the main peaks of the synthesized MOFs were closely consistent with those of the simulations from the single-crystal X-ray diffraction data, which imply high quality of the obtained products.

### The IR Spectra

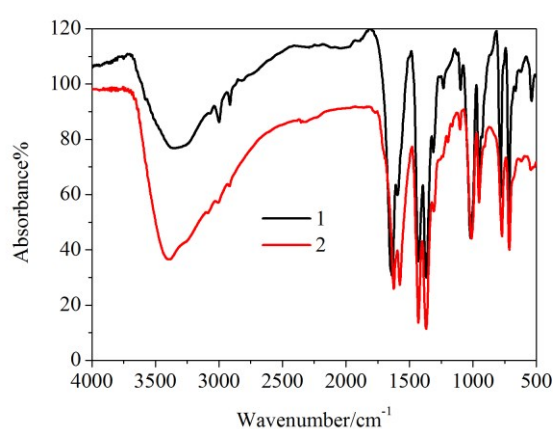

**Figure S7.** The IR spectra of **1** (black) and **2** (red) recorded from a KBr pellet.

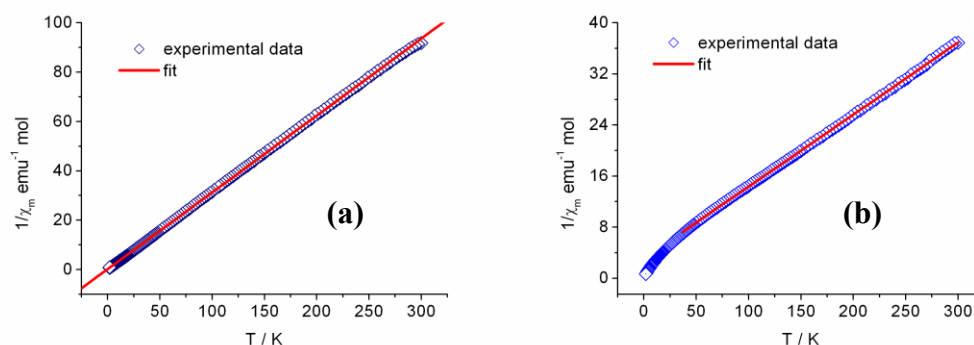

**Figure S8.** Reciprocal molar susceptibility as function of temperature for (a) **1** with  $C = 3.21 \text{ emu K mol}^{-1}$ ,  $\theta = -0.59 \text{ K}$  and  $R = 0.99993$  and (b) **2** with  $C = 8.86 \text{ emu K mol}^{-1}$ ,  $\theta = -27.35 \text{ K}$  and  $R = 0.99995$ , where solid red line indicates Curie–Weiss fitting in the range 2–300 K.



## References

- 1 Wood, R. M.; Palenik, G. J. *Inorg. Chem.* **1998**, 37, 4149–4151.
